# Supplementary material
Source: HighWire-hosted journal article supplement (https://openheart.bmj.com/content/7/2/e001360)
Supplement: inline-supplementary-material-2 [file inline-supplementary-material-2.pdf]

**Video:**

Patient 1 – Transthoracic echocardiogram of patient 1, shows typical takotsubo cardiomyopathy (TC) variant.

Patient 2: TTE of patient 2, shows biventricular variant of TC. White arrow indicating apical hypo/akinesis and red arrow shows basal right ventricular hyperkinesis.

Patient 3: TTE of patient3, shows reverse or inverted TC variant.

Patient 4: TTE of patient 4, shows typical takotsubo cardiomyopathy (TC) variant.

Patient 5: TTE of patient 6, shows global takotsubo cardiomyopathy (TC) with apical cap sparing variant.

Patient 6: TTE of patient 6, shows reverse or inverted TC variant.

Patient 7: TTE of patient 7, shows typical TC variant.
